# Supplementary material
Source: publisher figshare collection journal article supplement (https://acs.figshare.com/ndownloader/files/5743788)
Supplement: Supplementary file 1 [file 5743788]

data_rfnor
 
_audit_creation_method            SHELXL-97
_chemical_name_systematic
;
 ?
;
_chemical_name_common             ?
_chemical_melting_point           ?
_chemical_formula_moiety          ?
_chemical_formula_sum
 'C108 H128 B2 Cl4 N12 O4 Zn2' 
_chemical_formula_weight          1952.38 
 
loop_
 _atom_type_symbol
 _atom_type_description
 _atom_type_scat_dispersion_real
 _atom_type_scat_dispersion_imag
 _atom_type_scat_source
 'C'  'C'   0.0033   0.0016
 'International Tables Vol C Tables 4.2.6.8 and 6.1.1.4'
 'H'  'H'   0.0000   0.0000
 'International Tables Vol C Tables 4.2.6.8 and 6.1.1.4'
 'B'  'B'   0.0013   0.0007
 'International Tables Vol C Tables 4.2.6.8 and 6.1.1.4'
 'N'  'N'   0.0061   0.0033
 'International Tables Vol C Tables 4.2.6.8 and 6.1.1.4'
 'O'  'O'   0.0106   0.0060
 'International Tables Vol C Tables 4.2.6.8 and 6.1.1.4'
 'Cl'  'Cl'   0.1484   0.1585
 'International Tables Vol C Tables 4.2.6.8 and 6.1.1.4'
 'Zn'  'Zn'   0.2839   1.4301
 'International Tables Vol C Tables 4.2.6.8 and 6.1.1.4'
 
_symmetry_cell_setting            Monoclinic
_symmetry_space_group_name_H-M    C2/c
 
loop_
 _symmetry_equiv_pos_as_xyz
 'x, y, z'
 '-x, y, -z+1/2'
 'x+1/2, y+1/2, z'
 '-x+1/2, y+1/2, -z+1/2'
 '-x, -y, -z'
 'x, -y, z-1/2'
 '-x+1/2, -y+1/2, -z'
 'x+1/2, -y+1/2, z-1/2'
 
_cell_length_a                    32.376(2)
_cell_length_b                    18.9790(12)
_cell_length_c                    18.4471(12)
_cell_angle_alpha                 90.00
_cell_angle_beta                  116.337(3)
_cell_angle_gamma                 90.00
_cell_volume                      10158.4(11)
_cell_formula_units_Z             4
_cell_measurement_temperature     118(2)
_cell_measurement_reflns_used     7402
_cell_measurement_theta_min       2.80
_cell_measurement_theta_max       22.33
 
_exptl_crystal_description        block
_exptl_crystal_colour             brown
_exptl_crystal_size_max           0.24
_exptl_crystal_size_mid           0.20
_exptl_crystal_size_min           0.18
_exptl_crystal_density_meas       ?
_exptl_crystal_density_diffrn     1.277
_exptl_crystal_density_method     'not measured'
_exptl_crystal_F_000              4120
_exptl_absorpt_coefficient_mu     0.635
_exptl_absorpt_correction_type    multi-scan
_exptl_absorpt_correction_T_min   0.8625
_exptl_absorpt_correction_T_max   0.8942
_exptl_absorpt_process_details    'Blessing, Acta Cryst. (1995) A51 33-38.'
 
_exptl_special_details
;
 2927 frames x 60 sec. @ 4.950 cm; 0.2 deg. steps in omega & phi
;
 
_diffrn_ambient_temperature       118(2)
_diffrn_radiation_wavelength      0.71073
_diffrn_radiation_type            MoK\a
_diffrn_radiation_source          'fine-focus sealed tube'
_diffrn_radiation_monochromator   graphite
_diffrn_measurement_device_type   'CCD area detector'
_diffrn_measurement_method        'phi and omega scans'
_diffrn_detector_area_resol_mean  0.90
_diffrn_standards_number          ?
_diffrn_standards_interval_count  ?
_diffrn_standards_interval_time   ?
_diffrn_standards_decay_%         ?
_diffrn_reflns_number             33091
_diffrn_reflns_av_R_equivalents   0.0636
_diffrn_reflns_av_sigmaI/netI     0.0508
_diffrn_reflns_limit_h_min        -35
_diffrn_reflns_limit_h_max        32
_diffrn_reflns_limit_k_min        -21
_diffrn_reflns_limit_k_max        21
_diffrn_reflns_limit_l_min        -20
_diffrn_reflns_limit_l_max        20
_diffrn_reflns_theta_min          2.80
_diffrn_reflns_theta_max          23.30
_reflns_number_total              7306
_reflns_number_gt                 4627
_reflns_threshold_expression      >2sigma(I)
 
_computing_data_collection        'Bruker SMART'
_computing_cell_refinement        'Bruker SMART'
_computing_data_reduction         'Bruker SHELXTL'
_computing_structure_solution     'Bruker SHELXTL'
_computing_structure_refinement   'Bruker SHELXTL'
_computing_molecular_graphics     'Bruker SHELXTL'
_computing_publication_material   'Bruker SHELXTL'
 
_refine_special_details
;
 Refinement of F^2^ against ALL reflections.  The weighted R-factor wR and
 goodness of fit S are based on F^2^, conventional R-factors R are based
 on F, with F set to zero for negative F^2^. The threshold expression of
 F^2^ > 2sigma(F^2^) is used only for calculating R-factors(gt) etc. and is
 not relevant to the choice of reflections for refinement.  R-factors based
 on F^2^ are statistically about twice as large as those based on F, and R-
 factors based on ALL data will be even larger.
;
 
_refine_ls_structure_factor_coef  Fsqd
_refine_ls_matrix_type            full
_refine_ls_weighting_scheme       calc
_refine_ls_weighting_details
 'calc w=1/[\s^2^(Fo^2^)+(0.1925P)^2^+48.5126P] where P=(Fo^2^+2Fc^2^)/3'
_atom_sites_solution_primary      direct
_atom_sites_solution_secondary    difmap
_atom_sites_solution_hydrogens    geom
_refine_ls_hydrogen_treatment     mixed
_refine_ls_extinction_method      none
_refine_ls_extinction_coef        ?
_refine_ls_number_reflns          7306
_refine_ls_number_parameters      608
_refine_ls_number_restraints      0
_refine_ls_R_factor_all           0.1366
_refine_ls_R_factor_gt            0.0903
_refine_ls_wR_factor_ref          0.3128
_refine_ls_wR_factor_gt           0.2638
_refine_ls_goodness_of_fit_ref    1.025
_refine_ls_restrained_S_all       1.025
_refine_ls_shift/su_max           0.000
_refine_ls_shift/su_mean          0.000
 
loop_
 _atom_site_label
 _atom_site_type_symbol
 _atom_site_fract_x
 _atom_site_fract_y
 _atom_site_fract_z
 _atom_site_U_iso_or_equiv
 _atom_site_adp_type
 _atom_site_occupancy
 _atom_site_symmetry_multiplicity
 _atom_site_calc_flag
 _atom_site_refinement_flags
 _atom_site_disorder_assembly
 _atom_site_disorder_group
Zn1 Zn 0.35434(3) -0.25717(4) 0.38619(5) 0.0543(4) Uani 1 1 d . . . 
Cl1 Cl 0.26595(12) 0.19505(16) 0.1210(2) 0.1212(12) Uani 1 1 d . . . 
Cl2 Cl 0.35551(12) 0.25998(19) 0.1752(3) 0.1297(13) Uani 1 1 d . . . 
C1 C 0.4126(3) -0.2280(4) 0.5450(5) 0.0543(19) Uani 1 1 d . . . 
C2 C 0.4330(3) -0.1894(5) 0.6182(5) 0.074(2) Uani 1 1 d . . . 
H2A H 0.4158 -0.1535 0.6285 0.089 Uiso 1 1 calc R . . 
C3 C 0.4766(3) -0.2030(5) 0.6735(6) 0.082(3) Uani 1 1 d . . . 
C4 C 0.5016(3) -0.2588(5) 0.6615(6) 0.081(3) Uani 1 1 d . . . 
H4A H 0.5314 -0.2689 0.7035 0.098 Uiso 1 1 calc R . . 
C5 C 0.4854(3) -0.3002(5) 0.5920(7) 0.082(3) Uani 1 1 d . . . 
C6 C 0.4394(3) -0.2822(4) 0.5288(5) 0.064(2) Uani 1 1 d . . . 
C7 C 0.5115(4) -0.3627(5) 0.5802(8) 0.096(3) Uani 1 1 d . . . 
C8 C 0.5590(4) -0.3727(7) 0.6527(9) 0.141(5) Uani 1 1 d . . . 
H8A H 0.5755 -0.3277 0.6658 0.211 Uiso 1 1 calc R . . 
H8B H 0.5767 -0.4076 0.6391 0.211 Uiso 1 1 calc R . . 
H8C H 0.5550 -0.3892 0.6996 0.211 Uiso 1 1 calc R . . 
C9 C 0.5188(5) -0.3536(6) 0.5041(9) 0.125(4) Uani 1 1 d . . . 
H9A H 0.4889 -0.3469 0.4570 0.188 Uiso 1 1 calc R . . 
H9B H 0.5338 -0.3957 0.4961 0.188 Uiso 1 1 calc R . . 
H9C H 0.5384 -0.3123 0.5105 0.188 Uiso 1 1 calc R . . 
C10 C 0.4832(4) -0.4310(5) 0.5697(8) 0.110(4) Uani 1 1 d . . . 
H10A H 0.4745 -0.4350 0.6140 0.165 Uiso 1 1 calc R . . 
H10B H 0.5019 -0.4718 0.5704 0.165 Uiso 1 1 calc R . . 
H10C H 0.4554 -0.4294 0.5180 0.165 Uiso 1 1 calc R . . 
C11 C 0.5000 -0.1611(8) 0.7500 0.085(4) Uani 1 2 d S . . 
C12 C 0.5000 -0.0903(7) 0.7500 0.081(4) Uani 1 2 d S . . 
C13 C 0.4822(4) -0.0367(5) 0.6808(6) 0.087(3) Uani 1 1 d . . . 
H13 H 0.4675 -0.0566 0.6248 0.104 Uiso 1 1 calc R . . 
C14 C 0.4515(4) 0.0082(7) 0.7049(7) 0.110(4) Uani 1 1 d . . . 
H14A H 0.4199 -0.0117 0.6824 0.131 Uiso 1 1 calc R . . 
H14B H 0.4497 0.0570 0.6847 0.131 Uiso 1 1 calc R . . 
C15 C 0.4736(4) 0.0071(7) 0.7967(7) 0.110(4) Uani 1 1 d . . . 
H15A H 0.4531 -0.0155 0.8168 0.132 Uiso 1 1 calc R . . 
H15B H 0.4811 0.0554 0.8191 0.132 Uiso 1 1 calc R . . 
C16 C 0.3243(5) -0.2529(7) 0.0757(6) 0.111(4) Uani 1 1 d . . . 
H16A H 0.3141 -0.3021 0.0688 0.167 Uiso 1 1 calc R . . 
H16B H 0.3432 -0.2448 0.0474 0.167 Uiso 1 1 calc R . . 
H16C H 0.2973 -0.2218 0.0533 0.167 Uiso 1 1 calc R . . 
C17 C 0.3517(4) -0.2376(5) 0.1630(6) 0.088(3) Uani 1 1 d . . . 
C18 C 0.3967(4) -0.2144(6) 0.2038(6) 0.098(3) Uani 1 1 d . . . 
H18A H 0.4167 -0.2027 0.1803 0.118 Uiso 1 1 calc R . . 
C19 C 0.4074(3) -0.2114(5) 0.2841(5) 0.078(3) Uani 1 1 d . . . 
C20 C 0.4512(3) -0.1898(5) 0.3537(6) 0.078(3) Uani 1 1 d . . . 
C21 C 0.4515(3) -0.1516(4) 0.4173(5) 0.074(2) Uani 1 1 d . . . 
H21A H 0.4233 -0.1400 0.4188 0.088 Uiso 1 1 calc R . . 
C22 C 0.4931(4) -0.1302(5) 0.4788(6) 0.085(3) Uani 1 1 d . . . 
H22A H 0.4924 -0.1043 0.5223 0.102 Uiso 1 1 calc R . . 
C23 C 0.5340(4) -0.1432(6) 0.4816(6) 0.088(3) Uani 1 1 d . . . 
C24 C 0.5337(4) -0.1836(7) 0.4197(7) 0.109(4) Uani 1 1 d . . . 
H24A H 0.5621 -0.1964 0.4202 0.130 Uiso 1 1 calc R . . 
C25 C 0.4926(4) -0.2064(6) 0.3559(6) 0.101(4) Uani 1 1 d . . . 
H25A H 0.4936 -0.2338 0.3136 0.121 Uiso 1 1 calc R . . 
C26 C 0.5812(5) -0.1205(7) 0.5506(7) 0.132(5) Uani 1 1 d . . . 
H26A H 0.6046 -0.1339 0.5315 0.158 Uiso 1 1 calc R . . 
C27 C 0.5951(5) -0.1556(8) 0.6262(9) 0.154(6) Uani 1 1 d . . . 
H27A H 0.6283 -0.1493 0.6593 0.231 Uiso 1 1 calc R . . 
H27B H 0.5881 -0.2060 0.6168 0.231 Uiso 1 1 calc R . . 
H27C H 0.5784 -0.1357 0.6546 0.231 Uiso 1 1 calc R . . 
C28 C 0.5816(4) -0.0397(6) 0.5527(7) 0.124(5) Uani 1 1 d . . . 
H28A H 0.5564 -0.0229 0.5640 0.186 Uiso 1 1 calc R . . 
H28B H 0.5775 -0.0214 0.5003 0.186 Uiso 1 1 calc R . . 
H28C H 0.6111 -0.0232 0.5952 0.186 Uiso 1 1 calc R . . 
C29 C 0.1886(3) -0.1996(4) 0.1285(5) 0.073(2) Uani 1 1 d . . . 
H29A H 0.1597 -0.1760 0.1193 0.110 Uiso 1 1 calc R . . 
H29B H 0.1834 -0.2505 0.1218 0.110 Uiso 1 1 calc R . . 
H29C H 0.1990 -0.1823 0.0894 0.110 Uiso 1 1 calc R . . 
C30 C 0.2247(3) -0.1842(4) 0.2131(5) 0.059(2) Uani 1 1 d . . . 
C31 C 0.2230(3) -0.1404(4) 0.2700(4) 0.0577(19) Uani 1 1 d . . . 
H31A H 0.1975 -0.1123 0.2647 0.069 Uiso 1 1 calc R . . 
C32 C 0.2655(3) -0.1446(4) 0.3372(4) 0.0531(18) Uani 1 1 d . . . 
C33 C 0.2801(3) -0.1047(3) 0.4126(5) 0.0522(18) Uani 1 1 d . . . 
C34 C 0.2481(3) -0.0875(4) 0.4407(5) 0.060(2) Uani 1 1 d . . . 
H34A H 0.2176 -0.1053 0.4129 0.072 Uiso 1 1 calc R . . 
C35 C 0.2591(3) -0.0455(4) 0.5074(5) 0.064(2) Uani 1 1 d . . . 
H35A H 0.2363 -0.0353 0.5250 0.077 Uiso 1 1 calc R . . 
C36 C 0.3032(3) -0.0179(4) 0.5494(4) 0.0584(19) Uani 1 1 d . . . 
C37 C 0.3358(3) -0.0346(4) 0.5217(5) 0.061(2) Uani 1 1 d . . . 
H37A H 0.3662 -0.0163 0.5492 0.073 Uiso 1 1 calc R . . 
C38 C 0.3243(3) -0.0776(4) 0.4546(5) 0.0583(19) Uani 1 1 d . . . 
H38A H 0.3471 -0.0886 0.4371 0.070 Uiso 1 1 calc R . . 
C39 C 0.3165(3) 0.0294(5) 0.6235(5) 0.076(2) Uani 1 1 d . . . 
H39A H 0.3437 0.0582 0.6297 0.091 Uiso 1 1 calc R . . 
C40 C 0.2782(4) 0.0792(6) 0.6139(7) 0.108(4) Uani 1 1 d . . . 
H40A H 0.2507 0.0521 0.6055 0.162 Uiso 1 1 calc R . . 
H40B H 0.2712 0.1098 0.5671 0.162 Uiso 1 1 calc R . . 
H40C H 0.2878 0.1081 0.6627 0.162 Uiso 1 1 calc R . . 
C41 C 0.3309(4) -0.0158(6) 0.6986(6) 0.097(3) Uani 1 1 d . . . 
H41A H 0.3416 0.0145 0.7465 0.145 Uiso 1 1 calc R . . 
H41B H 0.3560 -0.0473 0.7033 0.145 Uiso 1 1 calc R . . 
H41C H 0.3046 -0.0439 0.6946 0.145 Uiso 1 1 calc R . . 
C42 C 0.2369(4) -0.4119(5) 0.1333(5) 0.088(3) Uani 1 1 d . . . 
H42A H 0.2116 -0.3781 0.1180 0.132 Uiso 1 1 calc R . . 
H42B H 0.2245 -0.4600 0.1246 0.132 Uiso 1 1 calc R . . 
H42C H 0.2531 -0.4041 0.1001 0.132 Uiso 1 1 calc R . . 
C43 C 0.2700(3) -0.4023(4) 0.2212(5) 0.066(2) Uani 1 1 d . . . 
C44 C 0.2843(3) -0.4486(4) 0.2835(5) 0.068(2) Uani 1 1 d . . . 
H44A H 0.2751 -0.4964 0.2804 0.081 Uiso 1 1 calc R . . 
C45 C 0.3154(3) -0.4134(4) 0.3535(5) 0.0541(18) Uani 1 1 d . . . 
C46 C 0.3395(3) -0.4412(4) 0.4351(5) 0.058(2) Uani 1 1 d . . . 
C47 C 0.3506(3) -0.5129(4) 0.4461(6) 0.072(2) Uani 1 1 d . . . 
H47A H 0.3433 -0.5422 0.4003 0.087 Uiso 1 1 calc R . . 
C48 C 0.3717(3) -0.5412(5) 0.5217(7) 0.080(3) Uani 1 1 d . . . 
H48A H 0.3787 -0.5901 0.5269 0.096 Uiso 1 1 calc R . . 
C49 C 0.3833(3) -0.5024(5) 0.5908(6) 0.074(2) Uani 1 1 d . . . 
C50 C 0.3720(3) -0.4297(5) 0.5807(6) 0.073(2) Uani 1 1 d . . . 
H50A H 0.3793 -0.4009 0.6270 0.087 Uiso 1 1 calc R . . 
C51 C 0.3505(3) -0.4005(4) 0.5053(5) 0.062(2) Uani 1 1 d . . . 
H51A H 0.3429 -0.3518 0.5000 0.075 Uiso 1 1 calc R . . 
C52 C 0.4068(4) -0.5317(6) 0.6768(7) 0.098(3) Uani 1 1 d . . . 
H52A H 0.4291 -0.4955 0.7123 0.118 Uiso 1 1 calc R . . 
C53 C 0.4343(5) -0.6001(9) 0.6807(10) 0.173(7) Uani 1 1 d . . . 
H53A H 0.4468 -0.6199 0.7354 0.260 Uiso 1 1 calc R . . 
H53B H 0.4597 -0.5889 0.6674 0.260 Uiso 1 1 calc R . . 
H53C H 0.4138 -0.6345 0.6418 0.260 Uiso 1 1 calc R . . 
C54 C 0.3724(4) -0.5459(8) 0.7089(8) 0.130(5) Uani 1 1 d . . . 
H54A H 0.3572 -0.5018 0.7110 0.194 Uiso 1 1 calc R . . 
H54B H 0.3881 -0.5660 0.7634 0.194 Uiso 1 1 calc R . . 
H54C H 0.3492 -0.5794 0.6733 0.194 Uiso 1 1 calc R . . 
N1 N 0.3705(3) -0.2308(3) 0.2941(4) 0.0636(18) Uani 1 1 d . . . 
N2 N 0.3358(3) -0.2466(3) 0.2189(4) 0.0659(19) Uani 1 1 d . . . 
N3 N 0.2931(2) -0.1905(3) 0.3229(3) 0.0516(15) Uani 1 1 d . . . 
N4 N 0.2673(2) -0.2134(3) 0.2449(4) 0.0552(16) Uani 1 1 d . . . 
N5 N 0.3187(2) -0.3465(3) 0.3338(4) 0.0523(15) Uani 1 1 d . . . 
N6 N 0.2910(2) -0.3399(3) 0.2517(4) 0.0581(16) Uani 1 1 d . . . 
O1 O 0.3723(2) -0.2152(3) 0.4917(3) 0.0611(13) Uani 1 1 d . . . 
O2 O 0.4202(2) -0.3107(3) 0.4586(4) 0.0709(15) Uani 1 1 d . . . 
B1 B 0.2877(4) -0.2697(5) 0.2084(6) 0.063(2) Uani 1 1 d . . . 
H1 H 0.2666 -0.2754 0.1494 0.076 Uiso 1 1 calc R . . 
C55 C 0.3103(4) 0.2175(6) 0.0990(8) 0.111(4) Uani 1 1 d . . . 
H55A H 0.2980 0.2483 0.0506 0.133 Uiso 1 1 calc R . . 
H55B H 0.3221 0.1741 0.0848 0.133 Uiso 1 1 calc R . . 
 
loop_ 
 _atom_site_aniso_label 
 _atom_site_aniso_U_11 
 _atom_site_aniso_U_22 
 _atom_site_aniso_U_33 
 _atom_site_aniso_U_23 
 _atom_site_aniso_U_13 
 _atom_site_aniso_U_12 
Zn1 0.0721(6) 0.0403(5) 0.0524(6) -0.0076(4) 0.0293(5) -0.0121(4) 
Cl1 0.142(3) 0.088(2) 0.168(3) -0.037(2) 0.100(2) -0.0237(18) 
Cl2 0.100(2) 0.126(3) 0.159(3) -0.042(2) 0.053(2) -0.0044(18) 
C1 0.061(5) 0.041(4) 0.066(5) 0.004(4) 0.031(4) 0.000(4) 
C2 0.067(6) 0.081(6) 0.067(6) -0.003(5) 0.024(5) -0.003(5) 
C3 0.081(7) 0.084(7) 0.089(7) -0.005(5) 0.047(6) 0.007(5) 
C4 0.073(6) 0.073(6) 0.081(7) -0.003(5) 0.018(5) -0.003(5) 
C5 0.075(6) 0.059(6) 0.118(8) 0.003(5) 0.047(6) -0.002(5) 
C6 0.069(5) 0.048(4) 0.075(6) 0.005(4) 0.032(5) -0.010(4) 
C7 0.092(7) 0.061(6) 0.152(10) -0.008(6) 0.071(8) -0.003(5) 
C8 0.073(7) 0.110(10) 0.200(15) -0.018(10) 0.025(8) 0.021(7) 
C9 0.135(10) 0.089(8) 0.188(13) -0.004(9) 0.106(10) 0.017(8) 
C10 0.105(8) 0.059(6) 0.174(12) -0.001(7) 0.071(8) 0.009(6) 
C11 0.077(9) 0.104(11) 0.053(7) 0.000 0.011(6) 0.000 
C12 0.090(9) 0.060(8) 0.070(8) 0.000 0.015(7) 0.000 
C13 0.103(7) 0.082(7) 0.060(5) -0.003(5) 0.022(5) 0.014(6) 
C14 0.107(8) 0.104(9) 0.103(9) 0.000(7) 0.034(7) 0.014(7) 
C15 0.136(10) 0.106(9) 0.097(8) 0.001(7) 0.060(8) 0.026(8) 
C16 0.140(10) 0.150(11) 0.056(6) -0.026(6) 0.055(7) -0.041(8) 
C17 0.125(9) 0.092(7) 0.067(6) -0.017(5) 0.060(6) -0.021(6) 
C18 0.111(8) 0.122(9) 0.089(7) -0.027(7) 0.069(7) -0.048(7) 
C19 0.107(7) 0.079(6) 0.069(6) -0.013(5) 0.059(6) -0.026(6) 
C20 0.095(7) 0.076(6) 0.086(6) -0.014(5) 0.060(6) -0.042(5) 
C21 0.106(7) 0.059(5) 0.067(5) -0.012(4) 0.049(5) -0.029(5) 
C22 0.120(9) 0.072(6) 0.073(6) -0.013(5) 0.052(6) -0.032(6) 
C23 0.106(8) 0.089(7) 0.081(7) -0.006(6) 0.053(6) -0.032(6) 
C24 0.099(8) 0.144(11) 0.097(8) -0.018(8) 0.057(7) -0.050(8) 
C25 0.119(9) 0.120(9) 0.087(7) -0.031(7) 0.068(7) -0.046(8) 
C26 0.184(13) 0.119(10) 0.070(7) -0.005(7) 0.036(8) -0.078(10) 
C27 0.142(12) 0.109(11) 0.148(13) 0.007(10) 0.009(10) -0.020(9) 
C28 0.136(10) 0.112(10) 0.095(8) 0.011(7) 0.025(7) -0.057(8) 
C29 0.093(6) 0.058(5) 0.056(5) -0.002(4) 0.021(5) -0.012(5) 
C30 0.076(6) 0.040(4) 0.055(5) 0.003(4) 0.024(4) -0.003(4) 
C31 0.068(5) 0.043(4) 0.059(5) 0.004(4) 0.025(4) 0.000(4) 
C32 0.070(5) 0.035(4) 0.049(4) 0.003(3) 0.021(4) 0.001(3) 
C33 0.068(5) 0.024(3) 0.064(5) 0.001(3) 0.028(4) 0.000(3) 
C34 0.067(5) 0.047(4) 0.065(5) -0.008(4) 0.029(4) -0.010(4) 
C35 0.075(6) 0.051(5) 0.068(5) -0.005(4) 0.034(5) -0.006(4) 
C36 0.075(5) 0.044(4) 0.055(5) -0.005(3) 0.027(4) -0.001(4) 
C37 0.066(5) 0.047(4) 0.059(5) -0.010(4) 0.018(4) 0.000(4) 
C38 0.070(5) 0.041(4) 0.063(5) -0.007(4) 0.030(4) 0.007(4) 
C39 0.088(6) 0.067(6) 0.074(6) -0.022(5) 0.038(5) -0.002(5) 
C40 0.110(8) 0.087(8) 0.126(9) -0.049(7) 0.051(7) -0.001(6) 
C41 0.102(8) 0.112(9) 0.076(7) -0.024(6) 0.039(6) -0.004(6) 
C42 0.109(7) 0.060(5) 0.072(6) -0.021(5) 0.019(5) -0.012(5) 
C43 0.080(6) 0.047(5) 0.075(6) -0.016(4) 0.038(5) -0.005(4) 
C44 0.081(6) 0.043(4) 0.087(6) -0.015(4) 0.043(5) -0.011(4) 
C45 0.061(5) 0.037(4) 0.066(5) -0.008(4) 0.030(4) -0.003(3) 
C46 0.064(5) 0.035(4) 0.084(6) -0.006(4) 0.039(4) -0.010(3) 
C47 0.076(6) 0.051(5) 0.090(7) 0.001(5) 0.037(5) -0.002(4) 
C48 0.077(6) 0.050(5) 0.111(8) 0.003(6) 0.039(6) -0.005(4) 
C49 0.064(5) 0.066(6) 0.094(7) 0.020(5) 0.034(5) -0.001(4) 
C50 0.066(5) 0.078(6) 0.081(6) -0.002(5) 0.038(5) -0.012(5) 
C51 0.074(5) 0.044(4) 0.074(6) 0.005(4) 0.037(5) -0.008(4) 
C52 0.089(7) 0.092(8) 0.106(8) 0.030(6) 0.037(6) -0.005(6) 
C53 0.143(12) 0.205(17) 0.177(15) 0.112(13) 0.077(11) 0.086(12) 
C54 0.122(10) 0.156(12) 0.123(10) 0.049(9) 0.066(8) 0.017(9) 
N1 0.085(5) 0.057(4) 0.054(4) -0.016(3) 0.035(4) -0.020(4) 
N2 0.089(5) 0.062(4) 0.060(4) -0.013(3) 0.045(4) -0.018(4) 
N3 0.072(4) 0.038(3) 0.045(3) -0.006(3) 0.025(3) -0.009(3) 
N4 0.076(4) 0.038(3) 0.048(4) -0.007(3) 0.024(3) -0.007(3) 
N5 0.066(4) 0.038(3) 0.055(4) -0.011(3) 0.029(3) -0.005(3) 
N6 0.074(4) 0.039(3) 0.061(4) -0.017(3) 0.029(3) -0.010(3) 
O1 0.075(4) 0.047(3) 0.057(3) -0.007(2) 0.026(3) -0.002(3) 
O2 0.081(4) 0.049(3) 0.090(4) -0.012(3) 0.045(3) -0.010(3) 
B1 0.090(7) 0.051(5) 0.050(5) -0.013(4) 0.033(5) -0.008(5) 
C55 0.132(10) 0.091(8) 0.133(10) -0.038(7) 0.080(9) -0.033(7) 
 
_geom_special_details 
; 
 All esds (except the esd in the dihedral angle between two l.s. planes) 
 are estimated using the full covariance matrix.  The cell esds are taken 
 into account individually in the estimation of esds in distances, angles 
 and torsion angles; correlations between esds in cell parameters are only 
 used when they are defined by crystal symmetry.  An approximate (isotropic) 
 treatment of cell esds is used for estimating esds involving l.s. planes. 
; 
 
loop_ 
 _geom_bond_atom_site_label_1 
 _geom_bond_atom_site_label_2 
 _geom_bond_distance 
 _geom_bond_site_symmetry_2 
 _geom_bond_publ_flag 
Zn1 O1 1.938(5) . ? 
Zn1 N5 2.038(6) . ? 
Zn1 N1 2.048(6) . ? 
Zn1 O2 2.199(6) . ? 
Zn1 N3 2.201(6) . ? 
Cl1 C55 1.709(11) . ? 
Cl2 C55 1.716(12) . ? 
C1 O1 1.261(9) . ? 
C1 C2 1.416(11) . ? 
C1 C6 1.461(12) . ? 
C2 C3 1.351(12) . ? 
C3 C4 1.409(13) . ? 
C3 C11 1.500(13) . ? 
C4 C5 1.393(13) . ? 
C5 C6 1.466(13) . ? 
C5 C7 1.525(13) . ? 
C6 O2 1.281(10) . ? 
C7 C9 1.535(16) . ? 
C7 C8 1.538(15) . ? 
C7 C10 1.549(14) . ? 
C11 C12 1.343(19) . ? 
C11 C3 1.500(13) 2_656 ? 
C12 C13 1.530(13) 2_656 ? 
C12 C13 1.530(12) . ? 
C13 C14 1.520(14) . ? 
C13 C15 1.544(15) 2_656 ? 
C14 C15 1.518(15) . ? 
C15 C13 1.544(15) 2_656 ? 
C16 C17 1.482(14) . ? 
C17 N2 1.352(11) . ? 
C17 C18 1.382(14) . ? 
C18 C19 1.364(13) . ? 
C19 N1 1.339(11) . ? 
C19 C20 1.488(13) . ? 
C20 C25 1.358(14) . ? 
C20 C21 1.376(12) . ? 
C21 C22 1.384(13) . ? 
C22 C23 1.324(14) . ? 
C23 C24 1.371(15) . ? 
C23 C26 1.554(15) . ? 
C24 C25 1.397(14) . ? 
C26 C27 1.427(16) . ? 
C26 C28 1.534(18) . ? 
C29 C30 1.507(11) . ? 
C30 N4 1.353(10) . ? 
C30 C31 1.360(11) . ? 
C31 C32 1.386(10) . ? 
C32 N3 1.354(9) . ? 
C32 C33 1.466(10) . ? 
C33 C34 1.388(10) . ? 
C33 C38 1.389(11) . ? 
C34 C35 1.374(11) . ? 
C35 C36 1.391(11) . ? 
C36 C37 1.398(11) . ? 
C36 C39 1.529(11) . ? 
C37 C38 1.389(10) . ? 
C39 C40 1.506(13) . ? 
C39 C41 1.516(13) . ? 
C42 C43 1.507(12) . ? 
C43 C44 1.354(12) . ? 
C43 N6 1.357(9) . ? 
C44 C45 1.404(11) . ? 
C45 N5 1.338(9) . ? 
C45 C46 1.452(11) . ? 
C46 C47 1.401(11) . ? 
C46 C51 1.410(11) . ? 
C47 C48 1.361(13) . ? 
C48 C49 1.373(13) . ? 
C49 C50 1.419(13) . ? 
C49 C52 1.528(13) . ? 
C50 C51 1.366(12) . ? 
C52 C54 1.502(15) . ? 
C52 C53 1.558(18) . ? 
N1 N2 1.375(9) . ? 
N2 B1 1.547(12) . ? 
N3 N4 1.375(8) . ? 
N4 B1 1.558(11) . ? 
N5 N6 1.381(8) . ? 
N6 B1 1.534(11) . ? 
 
loop_ 
 _geom_angle_atom_site_label_1 
 _geom_angle_atom_site_label_2 
 _geom_angle_atom_site_label_3 
 _geom_angle 
 _geom_angle_site_symmetry_1 
 _geom_angle_site_symmetry_3 
 _geom_angle_publ_flag 
O1 Zn1 N5 132.2(2) . . ? 
O1 Zn1 N1 131.2(2) . . ? 
N5 Zn1 N1 96.3(2) . . ? 
O1 Zn1 O2 78.6(2) . . ? 
N5 Zn1 O2 95.6(2) . . ? 
N1 Zn1 O2 94.7(3) . . ? 
O1 Zn1 N3 95.4(2) . . ? 
N5 Zn1 N3 92.2(2) . . ? 
N1 Zn1 N3 85.5(3) . . ? 
O2 Zn1 N3 172.1(2) . . ? 
O1 C1 C2 121.8(7) . . ? 
O1 C1 C6 118.7(7) . . ? 
C2 C1 C6 119.4(8) . . ? 
C3 C2 C1 120.7(9) . . ? 
C2 C3 C4 120.5(9) . . ? 
C2 C3 C11 122.0(9) . . ? 
C4 C3 C11 117.5(9) . . ? 
C5 C4 C3 124.0(9) . . ? 
C4 C5 C6 115.9(8) . . ? 
C4 C5 C7 124.2(10) . . ? 
C6 C5 C7 119.9(9) . . ? 
O2 C6 C1 115.9(7) . . ? 
O2 C6 C5 124.9(8) . . ? 
C1 C6 C5 119.2(8) . . ? 
C5 C7 C9 111.3(9) . . ? 
C5 C7 C8 112.0(10) . . ? 
C9 C7 C8 108.0(10) . . ? 
C5 C7 C10 109.6(8) . . ? 
C9 C7 C10 107.6(10) . . ? 
C8 C7 C10 108.2(10) . . ? 
C12 C11 C3 122.0(7) . . ? 
C12 C11 C3 122.0(7) . 2_656 ? 
C3 C11 C3 115.9(13) . 2_656 ? 
C11 C12 C13 131.6(5) . 2_656 ? 
C11 C12 C13 131.6(5) . . ? 
C13 C12 C13 96.7(10) 2_656 . ? 
C14 C13 C12 100.5(8) . . ? 
C14 C13 C15 105.5(9) . 2_656 ? 
C12 C13 C15 100.0(7) . 2_656 ? 
C13 C14 C15 105.8(9) . . ? 
C14 C15 C13 103.3(9) . 2_656 ? 
N2 C17 C18 106.9(9) . . ? 
N2 C17 C16 123.8(10) . . ? 
C18 C17 C16 129.3(9) . . ? 
C19 C18 C17 107.6(8) . . ? 
N1 C19 C18 109.1(9) . . ? 
N1 C19 C20 121.6(7) . . ? 
C18 C19 C20 129.2(8) . . ? 
C25 C20 C21 117.6(9) . . ? 
C25 C20 C19 120.8(9) . . ? 
C21 C20 C19 121.5(9) . . ? 
C20 C21 C22 119.3(10) . . ? 
C23 C22 C21 124.7(10) . . ? 
C22 C23 C24 115.7(10) . . ? 
C22 C23 C26 125.6(11) . . ? 
C24 C23 C26 118.6(11) . . ? 
C23 C24 C25 121.8(11) . . ? 
C20 C25 C24 120.7(10) . . ? 
C27 C26 C28 116.5(11) . . ? 
C27 C26 C23 116.1(10) . . ? 
C28 C26 C23 107.0(11) . . ? 
N4 C30 C31 107.4(7) . . ? 
N4 C30 C29 122.9(7) . . ? 
C31 C30 C29 129.7(8) . . ? 
C30 C31 C32 106.8(7) . . ? 
N3 C32 C31 110.0(6) . . ? 
N3 C32 C33 123.5(6) . . ? 
C31 C32 C33 126.4(7) . . ? 
C34 C33 C38 117.3(7) . . ? 
C34 C33 C32 119.7(7) . . ? 
C38 C33 C32 122.7(7) . . ? 
C35 C34 C33 122.2(7) . . ? 
C34 C35 C36 120.7(8) . . ? 
C35 C36 C37 117.8(7) . . ? 
C35 C36 C39 122.1(8) . . ? 
C37 C36 C39 120.1(7) . . ? 
C38 C37 C36 120.8(8) . . ? 
C37 C38 C33 121.1(8) . . ? 
C40 C39 C41 111.5(9) . . ? 
C40 C39 C36 111.9(8) . . ? 
C41 C39 C36 109.6(7) . . ? 
C44 C43 N6 107.1(7) . . ? 
C44 C43 C42 130.3(8) . . ? 
N6 C43 C42 122.6(8) . . ? 
C43 C44 C45 108.0(7) . . ? 
N5 C45 C44 108.2(7) . . ? 
N5 C45 C46 123.7(6) . . ? 
C44 C45 C46 128.1(7) . . ? 
C47 C46 C51 117.0(8) . . ? 
C47 C46 C45 119.3(8) . . ? 
C51 C46 C45 123.6(7) . . ? 
C48 C47 C46 120.8(9) . . ? 
C47 C48 C49 123.1(9) . . ? 
C48 C49 C50 116.9(9) . . ? 
C48 C49 C52 125.0(9) . . ? 
C50 C49 C52 118.1(10) . . ? 
C51 C50 C49 120.8(9) . . ? 
C50 C51 C46 121.4(8) . . ? 
C54 C52 C49 111.1(9) . . ? 
C54 C52 C53 109.9(10) . . ? 
C49 C52 C53 111.2(11) . . ? 
C19 N1 N2 107.4(6) . . ? 
C19 N1 Zn1 138.9(6) . . ? 
N2 N1 Zn1 112.9(5) . . ? 
C17 N2 N1 109.0(8) . . ? 
C17 N2 B1 130.0(8) . . ? 
N1 N2 B1 120.9(6) . . ? 
C32 N3 N4 105.0(6) . . ? 
C32 N3 Zn1 141.6(5) . . ? 
N4 N3 Zn1 111.1(4) . . ? 
C30 N4 N3 110.7(6) . . ? 
C30 N4 B1 129.6(7) . . ? 
N3 N4 B1 119.5(6) . . ? 
C45 N5 N6 107.0(6) . . ? 
C45 N5 Zn1 139.3(5) . . ? 
N6 N5 Zn1 113.6(4) . . ? 
C43 N6 N5 109.7(6) . . ? 
C43 N6 B1 129.5(7) . . ? 
N5 N6 B1 120.8(6) . . ? 
C1 O1 Zn1 116.7(5) . . ? 
C6 O2 Zn1 109.0(5) . . ? 
N6 B1 N2 110.2(7) . . ? 
N6 B1 N4 108.4(6) . . ? 
N2 B1 N4 110.4(6) . . ? 
Cl1 C55 Cl2 115.1(7) . . ? 
 
_diffrn_measured_fraction_theta_max    0.996
_diffrn_reflns_theta_full              23.30
_diffrn_measured_fraction_theta_full   0.996
_refine_diff_density_max    0.787
_refine_diff_density_min   -0.768
_refine_diff_density_rms    0.108
